# Supplementary material for: Remediation of Cr(VI)-Contaminated Soil by Nano-Zero-Valent Iron in Combination with Biochar or Humic Acid and the Consequences for Plant Performance
Source: MDPI journal article supplement (doi:10.3390/toxics8020026), 2020-04-03
Supplement: s1 [file s1]

# Supplementary Materials: Remediation of Cr(VI)-Contaminated Soil by Nano-Zero-Valent Iron in Combination with Biochar or Humic Acid and the Consequences for Plant Performance

Yuhuan Sun, Fangyuan Zheng, Wenjie Wang, Shuwu Zhang and Fayuan Wang

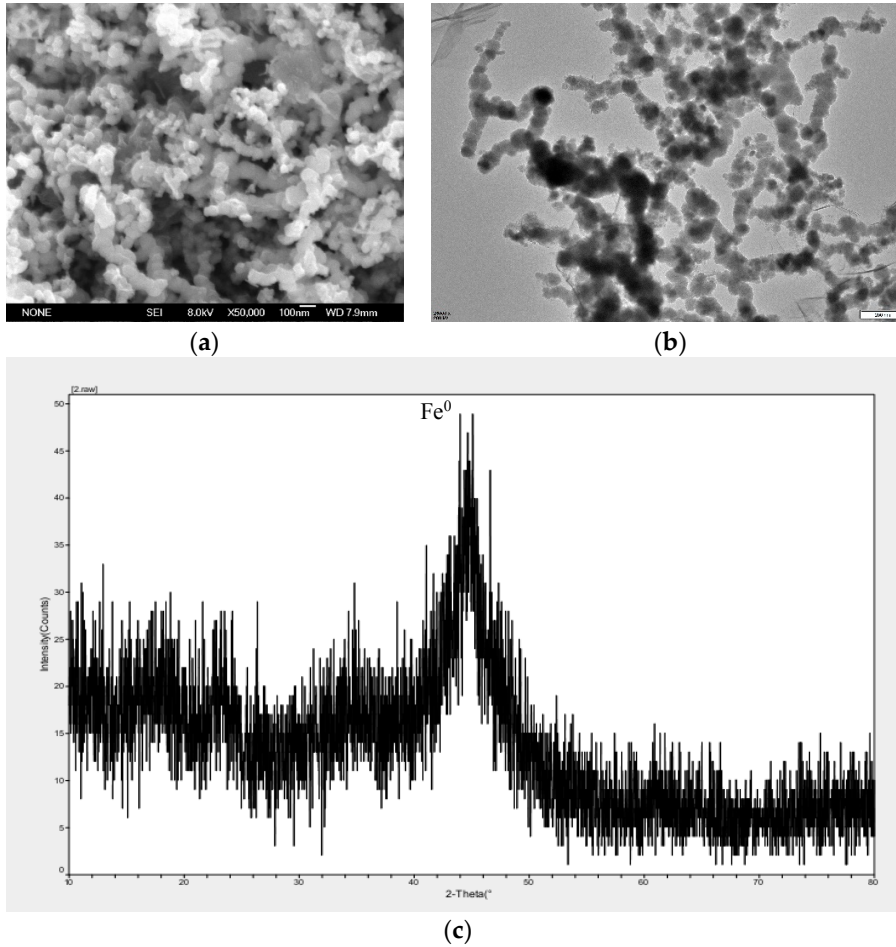

**Figure S1.** Characterization of S-nZVI: (a) SEM image; (b) TEM image; (c) XRD pattern.

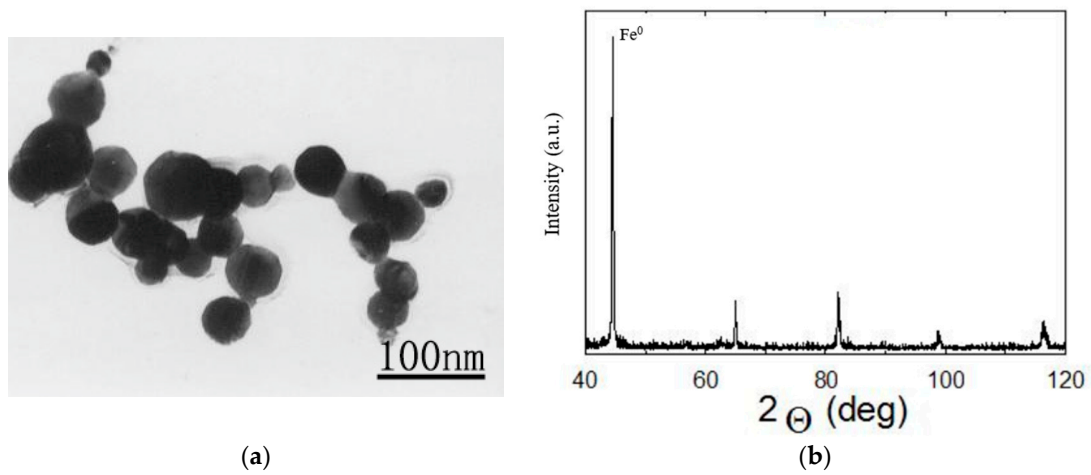

**Figure S2.** Characterization of B-nZVI: (a) SEM image; (b) XRD pattern.

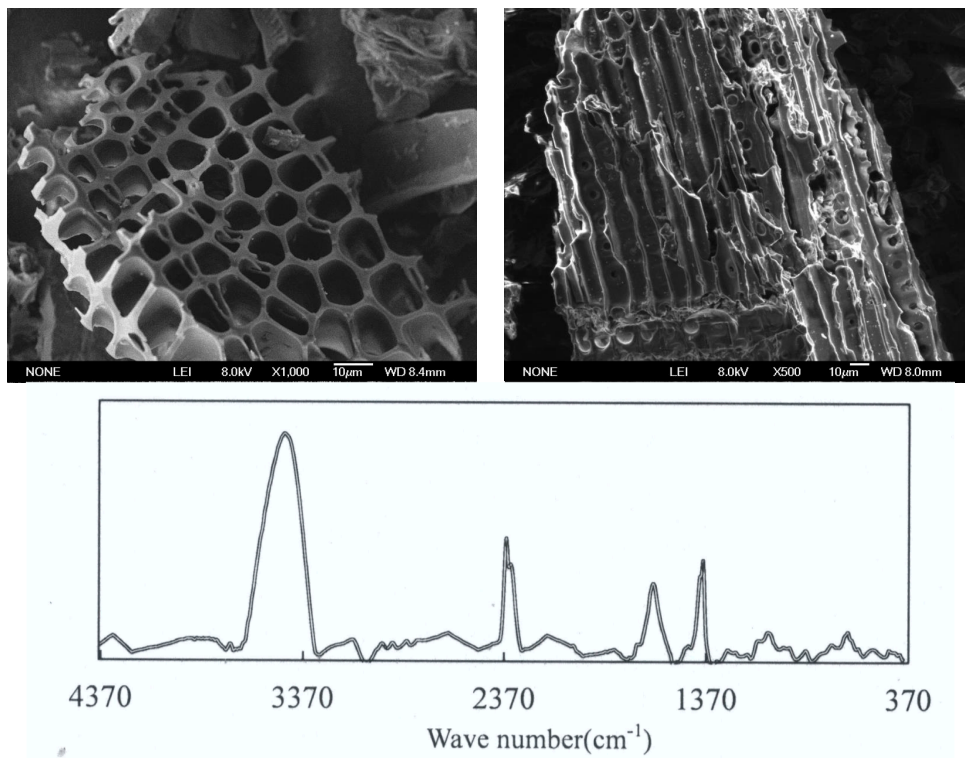

**Figure S3.** SEM images (upper) and FTIR spectra (lower) of biochar.

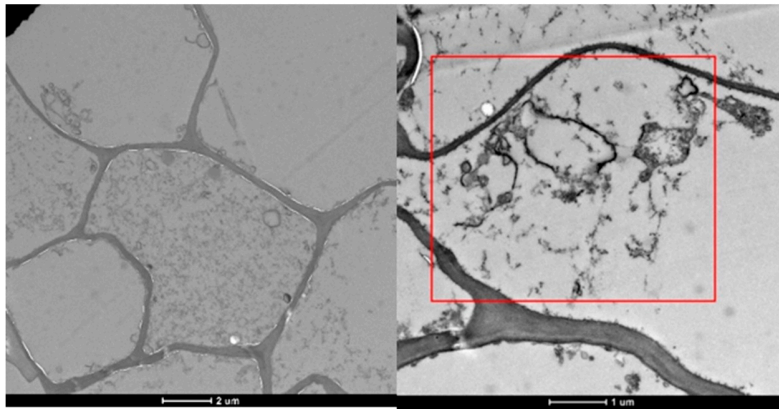

(A)

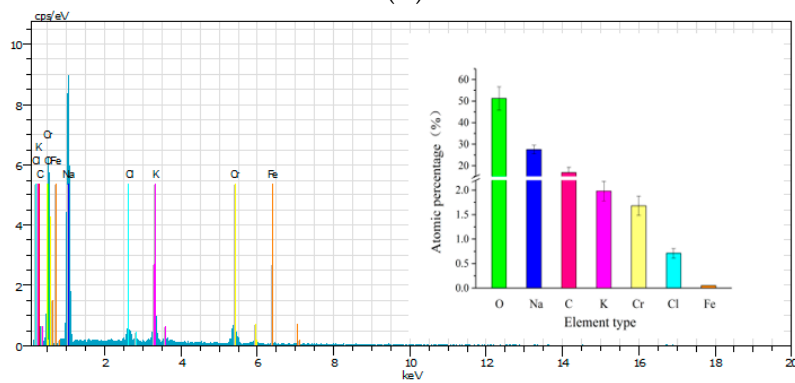

(a)

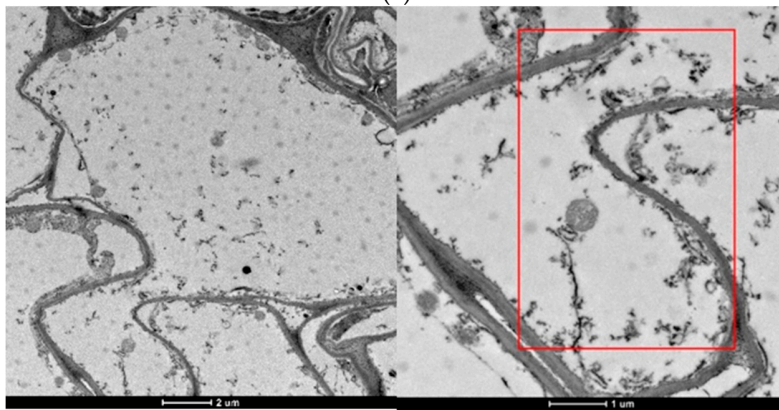

(B)

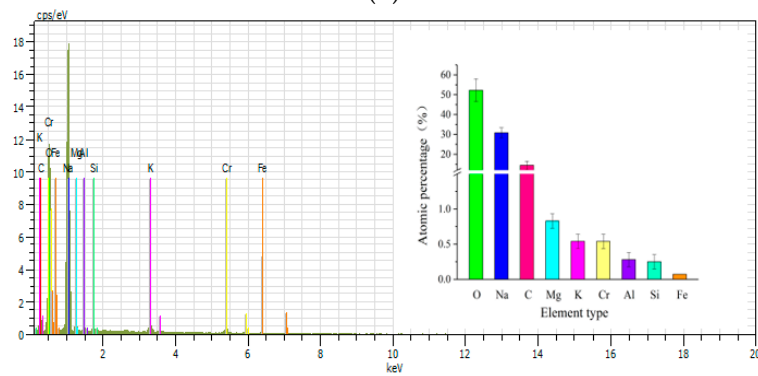

(b)

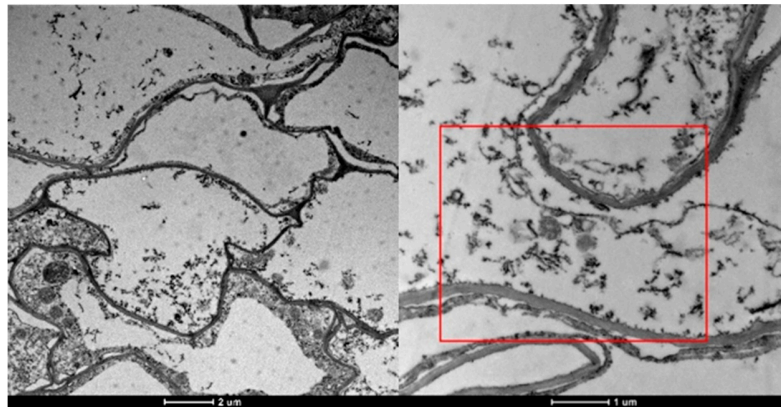

(C)

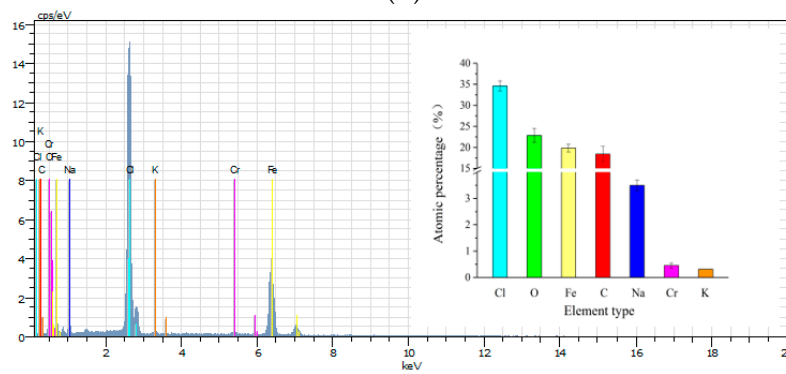

(c)

**Figure S4.** TEM (A–C) and EDS (a–c) images of root samples. (A,a) control roots; (B,b) roots exposed to 100 mg/kg S-nZVI; (C,c) roots exposed to 1000 mg/kg S-nZVI.
